# Supplementary material
Source: Royal Society of Chemistry journal article supplement (doi:10.1039/d6ay00096g)
Supplement: d6ay00096g2.pdf [file d6ay00096g2.pdf]

**Supplementary Table 1:** Comprehensive representation of estate origin, cultivar classification, harvesting season, and processing methodology of black tea samples collected from diverse geographical regions.

| <b>Sample</b> | <b>Origin</b> | <b>Estate</b> | <b>Cultivar</b>                    | <b>Harvest Season</b>  | <b>Processing</b> |
|---------------|---------------|---------------|------------------------------------|------------------------|-------------------|
| Assam         | Assam         | Siliguri      | Camellia sinensis<br>var. assamica | Jul–Sep                | Orthodox          |
| Bangladesh    | Bangladesh    | Sylhet        | Camellia sinensis                  | Jul–Sep                | Orthodox          |
| Kerala        | Kerala        | Idukki        | Camellia sinensis                  | September–<br>November | Orthodox          |
| Sri Lanka     | Sri Lanka     | Kandy         | Camellia sinensis                  | Jul–Sep                | Orthodox          |
