# Supplementary material
Source: Royal Society of Chemistry journal article supplement (doi:10.1039/d6ay00096g)
Supplement: d6ay00096g3.pdf [file d6ay00096g3.pdf]

**Supplementary Table 2:** Table representing the relative standard deviation (%RSD) values of various compounds identified in black tea samples from Assam, Bangladesh, Kerala, and Sri Lanka (N = 6). Compounds were selected based on high mzCloud best match scores.

| S. No | Name                                                      | Assam       |             |             |             |             |             | %RSD | Bangladesh  |             |             |             |             |             | %RSD       | Kerala      |             |             |             |             |             | %RSD       | Sri Lanka   |             |             |             |             |            | %RSD |
|-------|-----------------------------------------------------------|-------------|-------------|-------------|-------------|-------------|-------------|------|-------------|-------------|-------------|-------------|-------------|-------------|------------|-------------|-------------|-------------|-------------|-------------|-------------|------------|-------------|-------------|-------------|-------------|-------------|------------|------|
|       |                                                           | 1           | 2           | 3           | 4           | 5           | 6           |      | 1           | 2           | 3           | 4           | 5           | 6           |            | 1           | 2           | 3           | 4           | 5           | 6           |            | 1           | 2           | 3           | 4           | 5           | 6          |      |
| 1     | Malic acid                                                | 406332      | 429298      | 385253      | 387089      | 377798      | 410680      | 4.86 | 251612      | 243981      | 248189      | 235946      | 253830      | 245600      | 2.57       | 1141690     | 1018541     | 809259      | 1154489     | 1064410     | 1005886     | 12.14      | 7522581     | 6968406     | 7630661     | 7286896     | 7646238     | 7517765    | 3.49 |
| 2     | 1-(4-Amino-4-carboxybutanoyl)-2-piperidinecarboxylic acid | 130954109   | 132340607   | 132570607   | 131334724   | 132673375   | 130191552   | 0.77 | 56920656    | 57072552    | 56870021    | 56886353    | 58307738    | 57353729    | 0.97       | 65026122    | 65412456    | 65657202    | 66488766    | 67182388    | 66440285    | 1.22       | 91049589    | 90264968    | 91874573    | 91368628    | 90271725    | 91169142   | 0.70 |
| 3     | 1,6-Bis-O-(3,4,5-trihydroxybenzoyl)hexopyranose           | 91772012    | 93208912    | 91137229    | 90825336    | 91816316    | 93258277    | 1.11 | 224840971   | 228090797   | 227641680   | 225579972   | 221970144   | 225063148   | 0.98       | 228272763   | 226181283   | 228887932   | 223711790   | 225493866   | 226020086   | 0.84       | 170624604   | 167251170   | 169318643   | 167505839   | 169451573   | 168747575  | 0.75 |
| 4     | 13-HOTrE                                                  | 308288147   | 303728701   | 304824958   | 301535997   | 308005077   | 314787328   | 1.52 | 204098206   | 201556234   | 204062489   | 205832957   | 204081007   | 204658430   | 0.69       | 277969747   | 278771117   | 276968175   | 279925128   | 263820041   | 273563615   | 2.17       | 391280697   | 447347921   | 449764608   | 457867977   | 451542700   | 452657595  | 5.64 |
| 5     | 2,4-Dihydroxybenzoic acid                                 | 71372621    | 70139312    | 69927616    | 69503118    | 69692935    | 69106540    | 1.11 | 85297510    | 83449517    | 83202997    | 80945351    | 82395620    | 82180348    | 1.77       | 117507816   | 116663437   | 117138314   | 113736004   | 116142843   | 115668487   | 1.24       | 61983170    | 63308247    | 62157031    | 62571401    | 62988210    | 62568314   | 0.79 |
| 6     | 3-(Sulfoxy)butanoic acid                                  | 452969290   | 454473581   | 461668124   | 451030945   | 451160755   | 454617591   | 0.86 | 176347886   | 176941750   | 173612730   | 173402763   | 172653526   | 173222222   | 1.04       | 379417123   | 365519863   | 376991498   | 377242176   | 368197764   | 374004979   | 1.47       | 332460476   | 325787184   | 330634742   | 319908170   | 323982533   | 324836315  | 1.41 |
| 7     | 3-Coumaric acid                                           | 78912709    | 77890341    | 77344445    | 77282254    | 75754698    | 76292449    | 1.46 | 30118331    | 29589909    | 28701583    | 28361953    | 27857000    | 30306457    | 3.42       | 40936110    | 40740763    | 40447596    | 39161763    | 38805050    | 39384470    | 2.27       | 55502285    | 57574336    | 56833009    | 57017409    | 59011388    | 57533602   | 2.00 |
| 8     | 3-Isopropylmalic acid                                     | 95601318    | 93735850    | 94509591    | 95157646    | 95064614    | 94908767    | 0.68 | 10377837    | 10952907    | 10630302    | 10631704    | 10611525    | 10623535    | 1.72       | 21126172    | 21937890    | 21591396    | 21528478    | 22011167    | 21700113    | 1.47       | 28719527    | 28009738    | 28731597    | 28615354    | 28468103    | 28594784   | 0.94 |
| 9     | 3-Methylxanthine                                          | 126497537   | 126319253   | 128588022   | 125751106   | 128253782   | 117529620   | 3.23 | 153807364   | 151368483   | 151956555   | 152195406   | 149405102   | 151184904   | 0.95       | 89522544    | 89656453    | 89972097    | 91739992    | 89549794    | 90380158    | 0.94       | 103774079   | 106649555   | 104252468   | 104892868   | 107350251   | 105466317  | 1.32 |
| 10    | 4-Coumaric acid                                           | 174095950   | 175241539   | 175640418   | 173883183   | 175730000   | 175783184   | 0.49 | 216208562   | 220160912   | 221665908   | 220624570   | 217357662   | 219882055   | 0.95       | 119679730   | 118540221   | 119554158   | 116947072   | 118501004   | 118288260   | 0.84       | 102092800   | 102158085   | 110589842   | 102121358   | 104095971   | 105565673  | 3.18 |
| 11    | 4-Hydroxybenzaldehyde                                     | 121895275   | 122411933   | 123485060   | 1233226400  | 121534113   | 127447175   | 1.78 | 67118688    | 67362161    | 67836485    | 67166496    | 66478268    | 67159441    | 0.65       | 45057423    | 43754455    | 44947095    | 45461496    | 43882935    | 44712676    | 1.52       | 62709526    | 62159118    | 62907008    | 63291465    | 62701914    | 62915630   | 0.59 |
| 12    | 4-Hydroxybenzoic acid                                     | 241225453   | 239884126   | 237808124   | 237334824   | 236176877   | 217105258   | 3.80 | 221945078   | 219542780   | 219271877   | 215938036   | 214517061   | 216574874   | 1.26       | 312975525   | 313111867   | 310048438   | 309474495   | 304639340   | 307997578   | 1.03       | 210114182   | 212042790   | 211481952   | 212612717   | 211592637   | 211839255  | 0.40 |
| 13    | 4-Oxoprolinone                                            | 277448765   | 280464074   | 279821119   | 280999547   | 282805023   | 288207213   | 1.30 | 419552303   | 420262471   | 419692850   | 414923038   | 414352753   | 416322493   | 0.63       | 250181219   | 252857732   | 253347279   | 255192601   | 253146806   | 253833701   | 0.65       | 269781736   | 268215378   | 267121361   | 268426194   | 262161485   | 265841152  | 1.01 |
| 14    | Adenine                                                   | 338179855   | 394542641   | 356164745   | 395219501   | 409028898   | 386803031   | 7.11 | 482477681   | 460785080   | 453776977   | 398530119   | 469385160   | 440563110   | 6.50       | 486047615   | 484942308   | 482662680   | 487168047   | 499927128   | 489852076   | 1.25       | 517834227   | 509908446   | 449154774   | 533812155   | 431994873   | 471586725  | 8.41 |
| 15    | Adenosine                                                 | 124588477   | 126312770   | 125548088   | 126267374   | 127116390   | 126309267   | 0.68 | 288773593   | 280879063   | 282995219   | 278770919   | 277704632   | 279822806   | 1.42       | 31725563    | 34037576    | 31250463    | 31829149    | 30963727    | 31275223    | 3.52       | 159818232   | 159485808   | 161428139   | 161547330   | 160235442   | 160997747  | 0.54 |
| 16    | Adenosine 5'-monophosphate                                | 126420608   | 130825355   | 129568858   | 130855593   | 128552894   | 129657765   | 1.28 | 134949843   | 134649634   | 133182403   | 133503664   | 136115751   | 134266885   | 0.79       | 78451270    | 78559791    | 79121524    | 78304457    | 78572729    | 78589849    | 0.35       | 146769416   | 146240228   | 146342686   | 146961375   | 146286869   | 146452406  | 0.20 |
| 17    | Asparagine                                                | 1062457135  | 1080696188  | 1010696188  | 1056599691  | 1064373882  | 1043888571  | 2.28 | 194049030   | 179437351   | 179912280   | 177688427   | 181711004   | 179769595   | 2.51       | 154593889   | 153426793   | 159276670   | 154360863   | 155172476   | 154887464   | 1.70       | 108648692   | 107061316   | 107223256   | 102382852   | 109557451   | 109637951  | 1.79 |
| 18    | Astragalin                                                | 839617162   | 876571923   | 823322253   | 799763643   | 937571815   | 853553150   | 5.63 | 912636235   | 926738424   | 1045380209  | 917627990   | 894842162   | 952616003   | 5.76       | 1308739470  | 1601343716  | 1282695834  | 1269014937  | 160434377   | 1385262783  | 11.06      | 1979382240  | 2008599857  | 1997716529  | 2032865595  | 1999053904  | 2007990076 | 0.88 |
| 19    | Betaine                                                   | 518342417   | 516022698   | 521305475   | 533561917   | 506306152   | 520389832   | 1.70 | 580162568   | 572685100   | 574696720   | 583360956   | 581725513   | 579927342   | 0.72       | 489814304   | 511905428   | 507732172   | 491531431   | 486998705   | 495326822   | 2.05       | 460179098   | 452624570   | 444383461   | 446898669   | 452700125   | 447900138  | 1.25 |
| 20    | Caffeine                                                  | 64263691240 | 64112629938 | 60113549454 | 64691667220 | 63724599842 | 62843270822 | 2.65 | 52660489182 | 51844173347 | 52689158909 | 51587007281 | 51901399841 | 52059187702 | 0.87       | 51288063013 | 51107340738 | 50520738545 | 50718410649 | 50554440523 | 50597763944 | 0.63       | 50187701266 | 49704350031 | 49068871362 | 49867899156 | 48717860622 | 4921811085 | 1.11 |
| 21    | Catechin                                                  | 314794248   | 276206493   | 270806072   | 276492346   | 274142659   | 273812342   | 5.93 | 1438956430  | 1426736091  | 1431617308  | 1430195769  | 1429702735  | 1430504487  | 0.29       | 459729001   | 448508825   | 450595487   | 452284066   | 455442065   | 452869230   | 0.87       | 2823330652  | 2833554211  | 2853159592  | 2870841922  | 2878244824  | 2867310803 | 0.77 |
| 22    | Catechin Gallate                                          | 932634214   | 932133493   | 924661241   | 921819067   | 908592755   | 918356338   | 0.98 | 1625409496  | 1622237336  | 1629886721  | 1592840635  | 1634730811  | 1619152334  | 0.91       | 1152471898  | 1137680037  | 1156653610  | 1149303636  | 1139835263  | 1148487512  | 0.64       | 2277576298  | 2279721214  | 2273765958  | 2270443631  | 2239839003  | 2261239540 | 0.65 |
| 23    | Chlorogenic acid                                          | 111012522   | 111473056   | 111676323   | 110330644   | 109838358   | 110613758   | 0.63 | 272900669   | 267606197   | 268607449   | 258487003   | 258815446   | 261968991   | 2.21       | 134784617   | 1362226408  | 135995400   | 137292031   | 137412502   | 136651306   | 0.74       | 258926296   | 252194199   | 255007167   | 250252107   | 259227823   | 254713694  | 1.40 |
| 24    | Choline                                                   | 1268019479  | 1264781850  | 1296610592  | 1287129276  | 1312311406  | 1298682408  | 1.44 | 1603185651  | 1628974190  | 1635432544  | 1702663870  | 1654106303  | 1664066788  | 2.07       | 1351969935  | 1427734212  | 1402674823  | 1355577923  | 1409735969  | 1389208886  | 2.18       | 1700356194  | 1595039327  | 1610738394  | 1579871342  | 1712770699  | 1634339459 | 3.39 |
| 25    | Citric acid                                               | 2298272802  | 2298857668  | 2320810709  | 2339230221  | 2297357258  | 2319131379  | 0.74 | 1827787578  | 1830251202  | 1850325671  | 1842331838  | 183045922   | 0.82        | 2693080465 | 2753523724  | 2732984397  | 2740130900  | 2569253945  | 2680663714  | 2.51        | 2256050762 | 2277796930  | 2241406612  | 2220127703  | 2221411309  | 2227522508  | 1.01       |      |
| 26    | collagin                                                  | 190551857   | 191800638   | 191279619   | 188543526   | 191492472   | 190437189   | 0.62 | 433773121   | 434211858   | 418991859   | 428064517   | 422939963   | 423331138   | 1.46       | 484686482   | 494398518   | 485224386   | 489205921   | 487782771   | 487272978   | 0.72       | 803696023   | 807462727   | 808253008   | 807902867   | 807902867   | 81353301   | 3.73 |
| 27    | D-(-)-Glutamine                                           | 387702878   | 388600569   | 374905088   | 376927028   | 381411218   | 377746428   | 1.52 | 219736781   | 219549626   | 223657270   | 222442384   | 224326122   | 223474475   | 0.93       | 314176106   | 312544891   | 303050241   | 311821998   | 303601359   | 306021137   | 1.58       | 203063170   | 206658077   | 207810632   | 209995139   | 212344388   | 209913324  | 1.55 |
| 28    | D-(-)-Quinic acid                                         | 11815303609 | 11794388823 | 11852862155 | 11969276141 | 11808696856 | 11876943700 | 0.55 | 13924680458 | 14178321555 | 14064511451 | 13984967188 | 14021831565 | 14023769680 | 0.61       | 14211011443 | 14322545220 | 13921690780 | 14131434120 | 14183456675 | 14078718448 | 0.96       | 15229380030 | 15145470161 | 14824763524 | 151620      |             |            |      |
