# Supplementary material
Source: Royal Society of Chemistry journal article supplement (doi:10.1039/d6ay00096g)
Supplement: d6ay00096g4.pdf [file d6ay00096g4.pdf]

**Supplementary Table 3:** Table providing the loading values derived from Partial Least Squares Discriminant Analysis (PLS-DA), representing the contribution of each identified feature/compound to the observed clustering and separation among the analyzed samples. Variables with higher absolute loading values are considered more influential in distinguishing between sample groups.

| Name                                                                                                                              | Comp 1   | Comp 2   | Comp 3   | Comp 4   | Comp 5   | Comp 6   | Comp 7     | Comp 8   |
|-----------------------------------------------------------------------------------------------------------------------------------|----------|----------|----------|----------|----------|----------|------------|----------|
| 9-HpODE                                                                                                                           | 0.022644 | 0.048738 | -0.02813 | 0.023839 | -0.01022 | 0.009372 | -0.00277   | -0.00131 |
| Malic acid                                                                                                                        | 0.13711  | 0.11535  | 0.081724 | -0.05928 | 0.012797 | -0.01405 | 0.022895   | 0.030958 |
| (15Z)-9,12,13-Trihydroxy-15-octadecenoic acid                                                                                     | 0.031255 | 0.010852 | 0.1152   | -0.04849 | 0.22282  | -0.01269 | 0.2335     | 0.027036 |
| (1S)-1,5-Anhydro-2-O-(6-deoxy- $\alpha$ -L-mannopyranosyl)-1-[5,7-dihydroxy-2-(4-hydroxyphenyl)-4-oxo-4H-chromen-6-yl]-D-glucitol | 0.036471 | -0.12289 | 0.030614 | -0.01824 | 0.025309 | -0.00667 | 0.010078   | -0.01299 |
| (1 $\xi$ )-1,5-Anhydro-1-[(2R,3R)-3,5,7-trihydroxy-2-(4-hydroxyphenyl)-4-oxo-3,4-dihydro-2H-chromen-6-yl]-D-glucitol              | -0.09812 | -0.00147 | -0.07354 | 0.054704 | -0.0129  | 0.004424 | -0.00916   | -0.01598 |
| 1-(4-Amino-4-carboxybutanoyl)-2-piperidinecarboxylic acid                                                                         | 0.042669 | 0.000205 | -0.37289 | -0.04751 | 0.50213  | -0.51022 | -0.28222   | 0.58644  |
| 1-(5,8-Dimethoxy-2,2-dimethyl-2H-chromen-6-yl)ethanone                                                                            | 0.19446  | 0.12214  | 0.27561  | -0.21883 | 0.069518 | -0.0034  | 0.03467    | 0.005219 |
| 1,3,6-Trigalloyl glucose                                                                                                          | 0.063649 | -0.03932 | -0.1042  | 0.099806 | -0.02192 | 0.010249 | -0.00134   | 0.004985 |
| 1,6-Bis-O-(3,4,5-trihydroxybenzoyl)hexopyranose                                                                                   | 0.057847 | -0.07603 | -0.05576 | 0.053886 | -0.00071 | 0.001867 | 0.004532   | 0.01085  |
| 1-[(3-Carboxypropyl)amino]-1-deoxy-beta-D-fructofuranose                                                                          | 0.086963 | -0.16656 | 0.075359 | -0.04967 | 0.023871 | -0.00208 | -0.00084   | -0.02806 |
| 13(S)-HpOTrE                                                                                                                      | 0.021607 | 0.008125 | -0.11579 | 0.10147  | -0.03792 | 0.013018 | -0.01062   | 0.000711 |
| 13-HOTrE                                                                                                                          | 0.036399 | 0.079983 | 0.053625 | -0.0396  | 0.016098 | 0.005761 | 0.010667   | 0.001633 |
| 1-Oxo-1,2,4-butanetricarboxylic acid                                                                                              | -0.03579 | 0.059185 | -0.05252 | 0.047604 | -0.01912 | 0.021064 | 0.000903   | 0.020462 |
| 1-Vinyl-2-pyrrolidone                                                                                                             | -0.07437 | -0.07747 | -0.09129 | 0.071781 | -0.02582 | 0.0005   | -0.01191   | -0.00189 |
| 2-(2-phenylethoxy)-6-[[[(3,4,5-trihydroxyoxan-2-yl)oxy]methyl]oxane-3,4,5-triol                                                   | -0.0685  | 0.015342 | -0.05807 | 0.04017  | -0.02068 | 0.006826 | -0.00997   | -0.00417 |
| 2-(acetylamino)-3-(1H-indol-3-yl)propanoic acid                                                                                   | -0.03121 | 0.12495  | 0.097581 | -0.09346 | -0.0024  | -0.00057 | 0.003697   | -0.00899 |
| 2,4-Dihydroxybenzoic acid                                                                                                         | 0.00246  | -0.02758 | -0.12035 | 0.10482  | -0.03618 | 0.005454 | -0.00605   | 0.017363 |
| 2,5-Furandicarboxylic acid                                                                                                        | 0.018241 | 0.045349 | -0.08503 | 0.064673 | -0.02211 | 0.010543 | 0.026869   | 0.041382 |
| 2,6-Diamino-4-hexenoic acid                                                                                                       | -0.08498 | -0.06525 | -0.10153 | 0.010841 | 0.045083 | -0.04914 | 0.082495   | 0.12891  |
| 2-[1-(2H-1,3-benzodioxol-5-yl)propan-2-yl]-6-methoxy-4-(prop-2-en-1-yl)phenol                                                     | 0.17429  | 0.10944  | 0.21037  | -0.14339 | 0.064762 | -0.01742 | 0.067168   | 0.03291  |
| 2-Coumaroylquinic acid                                                                                                            | -0.07505 | 0.027693 | 0.047286 | -0.04763 | 0.008934 | -0.00216 | 0.007701   | 0.002106 |
| 2'-deoxymugineic acid                                                                                                             | -0.02377 | -0.08805 | -0.20918 | 0.19485  | -0.1002  | 0.016163 | 0.078677   | -0.02186 |
| 2-Deoxypentose                                                                                                                    | -0.02674 | 0.035667 | -0.06607 | 0.048132 | -0.01648 | 0.009943 | -0.00393   | -0.007   |
| 2-monolinolenin                                                                                                                   | 0.04359  | 0.006561 | 0.23903  | -0.20581 | 0.069377 | -0.00454 | 0.006594   | 0.014504 |
| 3-(Sulfooxy)butanoic acid                                                                                                         | -0.0167  | 0.1067   | -0.04685 | 0.033564 | -0.03359 | 0.016334 | 0.000305   | 0.011556 |
| 3,4,5-trihydroxycyclohex-1-ene-1-carboxylic acid                                                                                  | -0.0305  | 0.026815 | -0.06702 | 0.054283 | -0.01705 | 0.002254 | -0.01334   | 0.005439 |
| 3,4-Dihydroxybenzaldehyde                                                                                                         | 0.097326 | -0.06903 | 0.07324  | -0.08768 | 0.019069 | 0.043938 | -0.06638   | 0.023292 |
| 3,5-Dihydroxy-4-(sulfooxy)benzoic acid                                                                                            | -0.04614 | 0.037055 | 0.10342  | -0.09307 | 0.03546  | 0.002014 | 0.004502   | -0.01519 |
| 3,6-Dideoxy-6-sulfohex-2-ulosonic acid                                                                                            | 0.0017   | 0.1259   | -0.03277 | 0.015402 | -0.019   | 0.025927 | -0.02287   | -0.0267  |
| 3-Amino-2-azepanone                                                                                                               | -0.07643 | -0.02463 | -0.01406 | 0.006284 | -0.00487 | -0.00172 | -0.01263   | 0.007737 |
| 3-Coumaric acid                                                                                                                   | -0.02617 | 0.10461  | 0.044154 | -0.04029 | -0.00997 | -0.00752 | 0.018636   | 0.007844 |
| 3-Hydroxy-4-methoxy-5-(sulfooxy)benzoic acid                                                                                      | 0.093927 | 0.022277 | 0.099917 | -0.07585 | 0.037009 | -0.00217 | 0.014992   | 0.00797  |
| 3-Hydroxy-N-(2-oxotetrahydro-3-furanyl)butanamide                                                                                 | -0.05947 | -0.01096 | 0.069801 | -0.06584 | 0.010363 | -0.00747 | 3.7062e-05 | -0.00147 |
| 3-Isopropylmalic acid                                                                                                             | -0.06811 | 0.14141  | 0.019036 | -0.0305  | -0.01041 | 0.004725 | 0.006933   | -0.01182 |
| 3-Methylxanthine                                                                                                                  | -0.03611 | -0.04969 | 0.070131 | -0.05899 | 0.014704 | -0.00663 | 0.003278   | -0.00216 |
| 3-sulfolactic acid                                                                                                                | 0.048251 | -0.01872 | -0.01176 | 0.016483 | -0.00052 | 0.015495 | -0.00194   | -0.01111 |
| 3-sulfopropanediol                                                                                                                | -0.02576 | 0.031504 | -0.11005 | 0.091735 | -0.0223  | 0.017629 | -0.00068   | -0.00084 |
| 4,5-Dihydroxy-3-oxo-1-                                                                                                            | -0.00566 | 0.012983 | -0.17509 | 0.14988  | -0.05117 | 0.014584 | -0.0286    | 0.013405 |

|                                                                                                                        |          |          |          |          |          |          |          |          |
|------------------------------------------------------------------------------------------------------------------------|----------|----------|----------|----------|----------|----------|----------|----------|
| <b>cyclohexene-1-carboxylic acid</b>                                                                                   |          |          |          |          |          |          |          |          |
| 4-acetamidobutyrate                                                                                                    | -0.02933 | -0.10555 | 0.064974 | -0.05362 | 0.027642 | -0.0127  | -0.00126 | -0.01831 |
| 4-Coumaric acid                                                                                                        | -0.06002 | -0.06617 | 0.022892 | -0.02403 | 0.015297 | -0.00115 | 0.004578 | -0.00864 |
| 4-Hydroxy-8-(beta-D-talopyranosyloxy)-2-quinolinecarboxylic acid                                                       | 0.073647 | -0.00384 | -0.11673 | 0.11127  | -0.02628 | 0.015786 | -0.00054 | -0.00233 |
| 4-Hydroxybenzaldehyde                                                                                                  | -0.07011 | 0.033127 | 0.079768 | -0.07672 | 0.011775 | -0.00132 | 0.002384 | -0.00361 |
| 4-Hydroxybenzoic acid                                                                                                  | -0.00159 | 0.013319 | -0.09917 | 0.087116 | -0.03194 | 0.001427 | 0.002552 | 0.00779  |
| 4-Methyleneglutamic acid                                                                                               | 0.099275 | 0.082801 | -0.00448 | 0.006435 | -0.02317 | -0.00603 | -0.02562 | 0.025092 |
| 4-METHYLBELLIFERYL- $\alpha$ -D-GLUCOSE                                                                                | -0.06326 | 0.037435 | 0.015981 | -0.02034 | -0.00363 | -0.00531 | 0.001757 | 0.015362 |
| 4-Oxoproline                                                                                                           | -0.01698 | -0.07543 | 0.039841 | -0.03584 | 0.014996 | -0.00944 | 0.001898 | -0.00694 |
| 4-p-Coumaroylquinic acid                                                                                               | -0.06676 | 0.073305 | 0.087708 | 0.036171 | 0.12202  | 0.021479 | -0.24391 | 0.060981 |
| 5-(2-Carboxyethyl)-2-hydroxyphenyl beta-D-glucopyranosiduronic acid                                                    | 0.11069  | -0.00733 | -0.08515 | 0.081249 | -0.0128  | 0.008918 | -0.00042 | -0.01081 |
| 5,7-Dihydroxy-2-(4-hydroxyphenyl)-6,8-bis[3,4,5-trihydroxy-6-(hydroxymethyl)tetrahydro-2H-pyran-2-yl]-4H-chromen-4-one | 0.036792 | 0.063608 | 0.022198 | -0.01039 | -0.00044 | 0.016529 | -0.0162  | -0.01649 |
| 5-[5-(methoxycarbonyl)-5,8a-dimethyl-2-methylidene-decahydronaphthalen-1-yl]-3-methylpentanoic acid                    | 0.076423 | 0.064689 | -0.1068  | 0.097419 | -0.02796 | 0.010044 | 0.00705  | -0.00366 |
| 5-Hydroxy-2-furoic acid                                                                                                | 0.017259 | 0.048308 | -0.07795 | 0.063831 | -0.01855 | 0.008209 | 0.017834 | 0.031495 |
| 5-hydroxy-4-methoxy-5,6-dihydro-2H-pyran-2-one                                                                         | -0.01836 | -0.16773 | -0.04177 | 0.043111 | -0.00333 | -0.08404 | 0.02939  | -0.04065 |
| 7-Hydroxycoumarine                                                                                                     | 0.04603  | -0.08237 | 0.062994 | -0.04646 | 0.026663 | -0.01324 | 0.005859 | 0.003225 |
| 8-hydroxy-deoxyguanosine                                                                                               | -0.0235  | -0.05239 | -0.00038 | 0.000281 | -0.01142 | -0.01198 | -0.00089 | -0.00405 |
| Acetophenone                                                                                                           | -0.0712  | 0.076487 | 0.069762 | -0.07387 | 0.009712 | -0.0108  | 0.015276 | 0.034698 |
| Adenine                                                                                                                | 0.037221 | -0.01833 | -0.13334 | 0.017242 | -0.09417 | -0.11233 | -0.06389 | 0.090451 |
| Adenosine                                                                                                              | -0.02014 | -0.07321 | 0.21703  | -0.17999 | 0.062432 | -0.03435 | 0.02373  | -0.01143 |
| Adenosine 3'5'-cyclic monophosphate                                                                                    | -0.05255 | -0.13795 | 0.002242 | -0.00644 | 0.013806 | -0.0057  | -0.02003 | -0.03375 |
| Adenosine 5'-monophosphate                                                                                             | -0.00492 | -0.00565 | 0.12909  | -0.11242 | 0.029088 | -0.01408 | 0.006644 | -0.00573 |
| Azefelin                                                                                                               | 0.048739 | 0.1768   | 0.04803  | -0.04405 | -0.03781 | -0.02834 | 0.033717 | 0.018823 |
| alpha-D-Xylopyranosyl-(1->6)-beta-D-glucopyranosyl-(1->4)-beta-D-glucopyranose                                         | 0.13133  | -0.05517 | -0.07393 | 0.078252 | -0.0013  | 0.010337 | -0.00087 | -0.00149 |
| alpha-Ketoglutaric acid                                                                                                | 0.020445 | 0.039292 | -0.08415 | 0.067694 | -0.03454 | -0.01294 | 0.031873 | 0.03541  |
| Asparagine                                                                                                             | -0.03939 | 0.093526 | -0.51474 | -0.02995 | 0.84821  | -0.01226 | 0.000839 | -0.34806 |
| Astragalin                                                                                                             | 0.080433 | 0.037512 | 0.020845 | -0.00085 | 0.027191 | -0.02573 | 0.031387 | -0.01701 |
| Astringin                                                                                                              | 0.033512 | -0.02011 | -0.1826  | 0.15152  | -0.04231 | 0.006512 | -0.02214 | 0.010788 |
| Benzoic acid                                                                                                           | 0.094113 | -0.07728 | 0.058331 | -0.03999 | 0.033721 | -0.00032 | 0.011336 | 0.010661 |
| Betaine                                                                                                                | -0.02755 | -0.0433  | 0.002601 | 0.006224 | 0.003585 | -0.01529 | -0.00461 | -0.02912 |
| Caffeine                                                                                                               | -0.04266 | 0.020379 | -0.00461 | -0.01079 | 0.01142  | -0.02772 | -0.01533 | 0.017835 |
| Catechin                                                                                                               | 0.10654  | -0.05715 | 0.16173  | -0.12338 | 0.067637 | -0.01665 | 0.017034 | 0.009493 |
| Catechin Gallate                                                                                                       | 0.076638 | -0.03641 | 0.12676  | -0.04767 | 0.002793 | -0.05087 | -0.02982 | -0.28166 |
| Chlorogenic acid                                                                                                       | 0.056102 | -0.06806 | 0.096798 | -0.07366 | 0.025625 | -0.01526 | 0.010989 | 0.001065 |
| Choline                                                                                                                | 0.031552 | -0.03459 | 0.050352 | -0.03353 | 0.030159 | -0.00034 | 0.010607 | -0.00114 |
| Citric acid                                                                                                            | 0.008597 | 0.049649 | -0.06458 | 0.058216 | -0.02044 | 0.008039 | 0.001826 | -0.00959 |
| L-coprine                                                                                                              | 0.003574 | 0.063658 | -0.04313 | 0.022873 | -0.01146 | 0.0298   | -0.00106 | 0.089411 |
| Corchorifatty acid F                                                                                                   | 0.046719 | 0.061384 | -0.05759 | 0.057272 | -0.02592 | -0.00899 | -0.02969 | 0.044481 |
| corilagin                                                                                                              | 0.10468  | -0.01964 | 0.023654 | -0.00997 | 0.008852 | -0.00254 | 0.012348 | 0.008105 |
| Corymboside                                                                                                            | 0.11501  | 0.033772 | -0.02407 | 0.02924  | -0.00765 | 0.00961  | -0.00144 | 0.008983 |
| Coumarin                                                                                                               | -0.05641 | 0.047623 | 0.024162 | -0.03    | 0.000755 | -0.00068 | 0.004318 | -0.01054 |
| Cyanidin                                                                                                               | -0.01785 | -0.00371 | 0.052538 | -0.06266 | 0.054034 | -0.02705 | -0.02366 | 0.012765 |
| Cytosine                                                                                                               | -0.05614 | -0.01025 | 0.065981 | -0.06719 | 0.028277 | 0.008304 | 0.01006  | -0.01828 |
| D-(-)-Quinic acid                                                                                                      | 0.042355 | -0.01611 | 0.003403 | -0.00053 | 0.003518 | -0.00648 | 0.006706 | -0.01895 |
| D-(-)-Glutamine                                                                                                        | -0.05453 | 0.046044 | -0.06751 | 0.051282 | -0.01538 | -0.00123 | -0.00402 | 0.006605 |
| dihomomethionine                                                                                                       | -0.11408 | -0.04059 | -0.14252 | 0.11031  | -0.04378 | 0.004296 | -0.01602 | -0.0036  |
| DL-2,6-Diaminopimelic acid                                                                                             | -0.05184 | -0.06331 | -0.07841 | 0.062258 | -0.0216  | -0.0062  | -0.00928 | 0.007332 |
| DL-Arginine                                                                                                            | -0.09915 | -0.00939 | 0.033482 | -0.03237 | 0.020868 | -0.00755 | -0.00831 | 0.002405 |
| D-PANTOTHENIC ACID                                                                                                     | 0.008091 | 0.034987 | -0.10414 | 0.087822 | -0.02918 | 0.010904 | -0.01193 | 0.016535 |
| D-(+)-Pyroglutamic Acid                                                                                                | -0.05034 | 0.029562 | -0.08565 | 0.073409 | -0.02785 | 0.006181 | -0.01708 | -0.0357  |
| D-Sucrose                                                                                                              | 0.10454  | -0.06513 | -0.0825  | 0.081572 | 0.003288 | 0.018987 | -0.00258 | 0.015309 |
| Ellagic acid                                                                                                           | -0.06692 | 0.052644 | 0.12268  | -0.11406 | 0.023133 | -0.00764 | 0.012692 | -0.00015 |
| Epicatechin                                                                                                            | 0.10997  | -0.06598 | 0.16232  | -0.12139 | 0.041379 | -0.00256 | 0.015837 | -0.01678 |
| EPIGALLOCATECHIN 3-O-(3-O-METHYL)GALLATE                                                                               | 0.19149  | -0.03766 | -0.05225 | 0.006075 | 0.14235  | -0.18413 | -0.15429 | -0.09119 |
| Epigallocatechin gallate                                                                                               | 0.079404 | -0.09762 | 0.079792 | -0.04495 | 0.039729 | -0.02562 | 0.033169 | -0.00555 |

|                                                                |           |          |          |          |          |          |            |            |
|----------------------------------------------------------------|-----------|----------|----------|----------|----------|----------|------------|------------|
| Esculetin                                                      | 0.04716   | 0.055909 | 0.14175  | -0.11552 | 0.040734 | -0.0116  | 0.008539   | 0.001602   |
| Frovatriptan                                                   | 0.12874   | 0.074574 | -0.17321 | 0.15818  | -0.04972 | 0.021159 | -0.01279   | 0.006729   |
| Fructoselysine                                                 | 0.035163  | -0.09807 | 0.08195  | -0.06434 | 0.036081 | -0.01153 | 0.000977   | -0.00872   |
| Fukiic acid                                                    | 0.045379  | -0.05482 | 0.003351 | -0.00335 | 0.033583 | -0.01111 | -0.01161   | 0.027769   |
| Fumaric acid                                                   | 0.080626  | -0.07966 | -0.14128 | -0.08546 | -0.43109 | 0.74118  | -0.65017   | 0.19033    |
| Galactonic acid                                                | 0.071389  | -0.05826 | -0.04864 | 0.054524 | -0.00838 | 0.006047 | -0.00517   | 0.004675   |
| Gallic acid                                                    | -8.50E-06 | -0.04876 | 0.14501  | -0.11842 | 0.045133 | -0.01593 | 0.014788   | -0.01161   |
| Gallocatechin                                                  | 0.11302   | -0.05949 | 0.14577  | -0.119   | 0.050591 | -0.02661 | -0.00043   | -0.0167    |
| gamma-Aminobutyric acid                                        | 0.010322  | -0.10914 | 0.038383 | -0.02981 | 0.033565 | -0.00945 | 0.002464   | 0.023665   |
| gamma-glutamyltyramine                                         | -0.11512  | 0.053749 | 0.092156 | -0.09256 | 0.017134 | -0.00818 | 0.005379   | 0.007981   |
| Glucogallin                                                    | -0.03303  | 0.028461 | -0.03878 | 0.036144 | -0.02337 | 0.005589 | -0.01054   | 0.006191   |
| Glu-Glu                                                        | -0.05755  | -0.05402 | 0.080341 | -0.06625 | 0.023018 | -0.02037 | 0.005692   | -0.01446   |
| L-Glutamic acid                                                | -0.04223  | 0.027002 | -0.08915 | 0.073469 | -0.02553 | 0.000954 | -0.00015   | -0.00759   |
| Guanine                                                        | -0.02345  | -0.05113 | 0.009149 | -0.00192 | -0.01176 | -0.01176 | 0.002026   | 5.0953e-05 |
| Guanosine monophosphate (GMP)                                  | -0.01235  | -0.09085 | 0.047622 | -0.03774 | 0.028295 | -0.00831 | -0.00932   | -0.01059   |
| Heptylbenzene                                                  | 0.095798  | 0.024942 | -0.11657 | 0.11117  | -0.03156 | 0.022507 | 0.002225   | -0.00617   |
| Hex-2-ulose                                                    | 0.02965   | -0.00806 | 0.16018  | 0.079387 | -0.09709 | -0.01903 | 0.31307    | -0.40468   |
| Hexaric acid                                                   | 0.051108  | -0.01271 | -0.10297 | 0.095133 | -0.02761 | 0.016513 | -0.01073   | 0.013218   |
| DL-Histidine                                                   | -0.08949  | 0.06936  | -0.02463 | 0.004802 | -0.01186 | -0.0018  | -0.00603   | 0.002685   |
| Isocitric acid                                                 | 0.001262  | 0.029759 | -0.1542  | 0.13025  | -0.04675 | 0.017563 | -0.02131   | 0.001151   |
| Isoleucine                                                     | -0.09086  | 0.051641 | 0.00057  | -0.00986 | -0.01488 | -0.00019 | -0.00187   | -0.00421   |
| isopropylmalic acid                                            | 0.013856  | -0.07148 | -0.12272 | 0.10926  | -0.02495 | 0.009447 | -0.01675   | -3.73E-05  |
| Juglalin                                                       | 0.10557   | 0.019441 | -0.07237 | 0.085952 | -0.01627 | 0.028387 | 0.033581   | 0.062791   |
| Kaempferol                                                     | 0.066472  | 0.036041 | -0.0278  | 0.027366 | -0.00685 | 0.004454 | -0.00338   | 0.01563    |
| Kaempferol-3-O-(6'''-trans-P-coumaroyl-2''-glucosyl)rhamnoside | -0.00086  | -0.02983 | -0.14283 | 0.12354  | -0.03069 | 0.012097 | -0.01605   | -0.02357   |
| Kynurenic acid                                                 | 0.019816  | 0.039801 | -0.06466 | 0.048833 | -0.02735 | 0.009449 | -0.01379   | 0.004098   |
| Lamiide                                                        | 0.084129  | 0.015363 | -0.12906 | 0.1175   | -0.02049 | 0.023778 | 0.000442   | -0.0073    |
| Leucine                                                        | -0.08944  | 0.044809 | -0.00516 | -0.00677 | -0.01083 | -0.00571 | -0.0052    | -0.00584   |
| Leucylproline                                                  | -0.00595  | -0.10516 | -0.0389  | 0.028224 | 0.014381 | -0.0098  | -0.00214   | 0.000591   |
| DL-Glutamine                                                   | 0.097417  | 0.026708 | -0.08021 | 0.071574 | -0.01636 | 0.009174 | 0.006218   | 0.017347   |
| L-Pyroglutamic acid                                            | -0.01596  | -0.07186 | 0.033525 | -0.02872 | 0.01483  | -0.00998 | 9.2481e-05 | 0.004646   |
| Luteolin                                                       | -0.01635  | 0.006412 | 0.10725  | -0.08731 | 0.066071 | -0.02496 | 0.022522   | -0.01809   |
| DL-Lysine                                                      | -0.05276  | 0.072057 | 0.011348 | 0.08624  | 0.20365  | -0.56866 | 0.3046     | -0.21168   |
| Maleamic acid                                                  | -0.14489  | 0.048652 | 0.052465 | -0.03493 | 0.039936 | 0.039184 | -0.00369   | -0.03496   |
| Metharbital                                                    | 0.044387  | -0.19902 | 0.002213 | 0.022736 | 0.041685 | -0.01915 | 0.004571   | -0.03297   |
| Methyl cinnamate                                               | -0.08605  | -0.01154 | -0.01317 | 0.001588 | -0.01554 | -0.00574 | 0.006475   | -0.0051    |
| Methyl gallate                                                 | 0.14774   | -0.00796 | -0.06721 | 0.057091 | -0.00443 | -0.01871 | -0.02773   | -0.01871   |
| MFC00135810                                                    | 0.10154   | -0.11437 | 0.022518 | 0.000894 | 0.033122 | -0.01035 | 0.009187   | -0.01301   |
| Miglitol                                                       | 0.088278  | -0.15359 | -0.07519 | 0.032595 | 0.07478  | -0.06048 | -0.0311    | 0.0779     |
| muramic acid                                                   | 0.08096   | -0.11779 | 0.061802 | -0.01731 | 0.035473 | -0.0105  | -0.00153   | 0.023495   |
| Myricetin                                                      | 0.1381    | -0.03545 | -0.00299 | 0.018465 | 0.010102 | 0.007173 | 0.006164   | 0.006222   |
| myricetin 3-O-beta-D-galactopyranoside                         | 0.13846   | -0.03685 | -0.00724 | 0.020344 | 0.009162 | 0.005355 | 0.005411   | 0.005614   |
| N-(3-Carboxypropanoyl)-5-hydroxynorvaline                      | 0.089237  | -0.1206  | 0.03911  | -0.01266 | -0.02097 | -0.11567 | -0.00754   | -0.13465   |
| N-acetyl-L-2-amino adipic acid                                 | 0.00294   | 0.017985 | 0.044088 | -0.05434 | -0.02154 | -0.02259 | -0.01935   | -0.04721   |
| N-Acetylneuraminic acid                                        | 0.061939  | -0.12913 | -0.03275 | 0.037863 | 0.006155 | -0.00313 | -0.01511   | -0.00589   |
| N-Acetylorithine                                               | -0.04813  | 0.050292 | -0.01491 | 0.006148 | -0.00179 | 0.003751 | 0.0112     | 0.002949   |
| Naringenin                                                     | 0.080753  | -0.04025 | 0.056396 | -0.04953 | -0.09039 | 0.018022 | 0.038072   | 0.067817   |
| N-Benzylformamide                                              | -0.07021  | 0.033019 | 0.084952 | -0.07542 | 0.013277 | -0.00549 | 0.00572    | 0.004877   |
| Neochlorogenic acid                                            | 0.038316  | -0.08781 | 0.053394 | -0.03631 | 0.009138 | 0.01205  | 0.020371   | -0.00553   |
| N-Glycosyl-L-asparagine                                        | -0.05689  | -0.05403 | 0.07749  | -0.07021 | 0.019006 | -0.01444 | -0.00119   | -0.00737   |
| Niacin                                                         | -0.0276   | -0.05813 | -0.05371 | 0.051071 | -0.02058 | -0.00495 | -0.00403   | 0.02374    |
| nicotianamine                                                  | -0.07454  | -0.00418 | -0.05362 | 0.038947 | -0.01924 | 0.005317 | -0.00231   | 0.00774    |
| Nicotinamide                                                   | 0.031276  | -0.02369 | 0.076633 | -0.05952 | 0.006158 | -0.00552 | 0.000851   | -0.02775   |
| Nicotinic acid                                                 | -0.03769  | 0.004305 | -0.08363 | 0.069245 | -0.01281 | 0.010597 | -0.01704   | 0.00175    |
| Nipecotinic acid                                               | -0.09181  | 0.044669 | 0.007812 | -0.0185  | -0.01007 | 0.000612 | -0.00782   | -0.01592   |
| Nor Leucine                                                    | -0.0414   | 0.053628 | 0.087262 | -0.07789 | 0.01613  | -0.00441 | -0.00635   | -0.01186   |
| NP-000358                                                      | 0.11967   | -0.0554  | 0.16278  | -0.12399 | 0.055568 | -0.01144 | 0.017243   | 0.007209   |
| NP-000587                                                      | -0.06603  | -0.06938 | 0.007808 | -0.01077 | 0.005948 | -0.00523 | 0.00146    | -0.00911   |
| NP-001346                                                      | -0.09343  | -0.06804 | -0.00469 | -0.00117 | 0.00199  | -0.00546 | -0.00427   | -0.00549   |
| NP-003191                                                      | 0.051614  | 0.048448 | -0.0545  | 0.054527 | -0.0235  | 0.001464 | -0.0072    | 0.022925   |
| NP-020139                                                      | 0.025246  | 0.001767 | -0.16252 | 0.13997  | -0.03759 | 0.022561 | -0.00524   | -0.01317   |
| NP-020760                                                      | 0.038139  | 0.044234 | -0.14512 | 0.12667  | -0.03082 | 0.022594 | -0.02026   | 0.004348   |
| N-Succinyl-L-diaminopimelic                                    | -0.01281  | -0.08822 | -0.05872 | 0.04785  | -0.00811 | 0.000764 | -0.02183   | -0.00891   |

|                                        |          |          |          |          |          |          |          |          |
|----------------------------------------|----------|----------|----------|----------|----------|----------|----------|----------|
| acid                                   |          |          |          |          |          |          |          |          |
| <b>N-Vinyl-2-pyrrolidone</b>           | -0.04909 | -0.11382 | -0.19395 | 0.16686  | -0.03502 | 0.01653  | -0.01759 | -0.02208 |
| <b>Oxypinnatanine</b>                  | -0.04038 | -0.01034 | 0.056848 | -0.05373 | 0.013079 | -0.00221 | 0.009885 | -0.00526 |
| <b>Patuletin</b>                       | -0.11582 | -0.04313 | 0.31382  | 0.097841 | 0.10527  | -0.01934 | -0.09775 | 0.18912  |
| <b>L-Phenylalanine</b>                 | -0.07494 | 0.04789  | 0.030936 | -0.03658 | -0.00299 | -0.00102 | -0.0002  | -0.01193 |
| <b>Phloionolic acid</b>                | 0.068372 | 0.033233 | 0.12157  | -0.10438 | 0.02922  | 0.001608 | 0.024731 | -0.00526 |
| <b>Pipecolic acid</b>                  | -0.0707  | -0.0778  | -0.08689 | 0.066846 | -0.02088 | 0.006038 | -0.01532 | 0.002175 |
| <b>Pirbuterol</b>                      | -0.11899 | -0.2382  | 0.10335  | -0.10115 | 0.067691 | 0.048027 | 0.011192 | 0.07491  |
| <b>Procyanidin A2</b>                  | -0.03038 | 0.055517 | -0.0762  | 0.084356 | -0.11042 | 0.057306 | 0.11545  | 0.19791  |
| <b>Procyanidin B2</b>                  | 0.091215 | -0.05174 | 0.070266 | -0.05039 | 0.040786 | -0.0167  | -0.00458 | -0.01032 |
| <b>Prodelphinidin B1</b>               | 0.041534 | -0.09816 | 0.090317 | -0.07266 | 0.042611 | -0.00897 | -0.00217 | -0.00612 |
| <b>Proline</b>                         | 0.024085 | 0.086865 | 0.041923 | -0.03202 | -0.00083 | 0.00339  | 0.001616 | -0.00109 |
| <b>Quercetin</b>                       | 0.052004 | -0.11134 | 0.025425 | 0.000862 | 0.039787 | -0.02869 | 0.030815 | -0.00488 |
| <b>QUERCETIN 3,7-DIGLUCOSIDE</b>       | 0.087983 | 0.036846 | -0.00263 | 0.008005 | 0.016198 | 0.019461 | 0.00101  | 0.001591 |
| <b>Quercetin 3-O-caffeyl-glucoside</b> | 0.075262 | 0.053083 | -0.25013 | 0.072655 | -0.03003 | -0.03071 | 0.021875 | 0.026123 |
| <b>Quercetin-3-O-β-pentoside</b>       | 0.092106 | 0.058678 | -0.05961 | 0.063697 | -0.02462 | 0.011168 | 0.002707 | 0.009321 |
| <b>Quercetin-3β-D-glucoside</b>        | 0.060581 | 0.043629 | -0.0106  | 0.013902 | -0.00405 | -0.00055 | -0.00115 | 0.025613 |
| <b>Robinin</b>                         | -0.01041 | -0.09215 | -0.15675 | 0.13472  | -0.03675 | 0.003707 | -0.01579 | -0.00086 |
| <b>Rutin</b>                           | 0.066655 | 0.07091  | -0.02404 | 0.028105 | -0.01346 | 0.010374 | -0.00016 | 0.009231 |
| <b>saccharopine</b>                    | 0.072867 | -0.12097 | 0.001841 | 0.01303  | 0.025018 | -0.00732 | 0.01493  | -0.00377 |
| <b>D-Serine</b>                        | -0.01571 | 0.020487 | -0.11202 | 0.092533 | -0.04199 | 0.010037 | -0.00106 | 0.013481 |
| <b>Spermidine</b>                      | 0.027844 | -0.06921 | -0.09736 | 0.081758 | -0.01534 | 0.016674 | -0.00933 | 0.011856 |
| <b>Spermine</b>                        | -0.11927 | -0.0547  | 0.030142 | -0.04561 | 0.019687 | 0.005898 | -0.00944 | -0.03042 |
| <b>DL-Stachydrine</b>                  | -0.06975 | -0.07213 | -0.08687 | 0.06859  | -0.02028 | 0.001566 | -0.01092 | -0.00234 |
| <b>Suberic acid</b>                    | -0.08665 | 0.077052 | 0.005063 | -0.01833 | 0.001621 | 0.012059 | -0.00262 | -0.00965 |
| <b>Succinic acid</b>                   | 0.056566 | -0.00367 | 0.003191 | -0.00274 | 0.010896 | -0.00606 | 0.002347 | 0.008094 |
| <b>Syringetin</b>                      | 0.10161  | -0.05304 | 0.077216 | -0.05495 | 0.032556 | -0.00808 | 0.00908  | -0.02065 |
| <b>Theaflavin-3-gallate</b>            | -0.01673 | 0.083123 | 0.059488 | -0.03664 | 0.10999  | 0.23677  | -0.38991 | 0.025739 |
| <b>Theobromine</b>                     | -0.06654 | -0.01629 | 0.076689 | -0.06743 | 0.016145 | -0.01597 | 0.011972 | 0.008353 |
| <b>Theogallin</b>                      | 0.048146 | -0.06627 | 0.0592   | -0.04116 | 0.026518 | -0.00924 | 0.003371 | -0.00762 |
| <b>Theophylline</b>                    | 0.038116 | -0.01076 | -0.15981 | -0.04846 | -0.04504 | -0.11716 | 0.17379  | 0.03522  |
| <b>Threonine</b>                       | -0.05766 | 0.04562  | 0.001844 | -0.00716 | -0.00807 | 0.000562 | -0.00687 | -0.01271 |
| <b>Tiliroside</b>                      | 0.069665 | 0.10132  | -0.01753 | 0.036434 | -0.00387 | -0.0568  | 0.025469 | -0.09592 |
| <b>trans-3-Indoleacrylic acid</b>      | -0.07395 | 0.064047 | -0.01126 | -0.0034  | -0.01312 | 0.002025 | -0.00199 | 0.00391  |
| <b>Traumatic Acid</b>                  | 0.087576 | -0.02499 | 0.051493 | -0.0358  | 0.027205 | -0.0095  | 0.009744 | 0.003703 |
| <b>Tricin</b>                          | -0.03655 | 0.060203 | 0.38813  | 0.049859 | 0.18897  | -0.05388 | -0.68963 | 0.43657  |
| <b>Trifolin</b>                        | 0.072112 | 0.043671 | -0.02403 | 0.026274 | -0.00756 | 0.005134 | 0.000244 | 0.015076 |
| <b>Tryptophan</b>                      | -0.09391 | 0.0616   | -0.00897 | -0.00306 | -0.00702 | -0.0035  | -0.00953 | -0.00484 |
| <b>Tyrosine</b>                        | -0.06897 | 0.03389  | 0.075883 | -0.06812 | 0.009687 | -0.00447 | 0.002978 | 0.008992 |
| <b>tyr-thr</b>                         | 0.014379 | -0.20547 | 0.046304 | -0.01198 | 0.12592  | -0.03837 | 0.038375 | 0.050663 |
| <b>Uracil</b>                          | 0.032703 | -0.06476 | 0.037122 | -0.02723 | 0.03881  | -0.01167 | 0.020782 | 0.033379 |
| <b>Uridine 5'-diphosphogalactose</b>   | -0.03829 | -0.02794 | -0.18084 | 0.14555  | -0.03857 | 0.012501 | -0.0163  | 0.000832 |
| <b>Uridine monophosphate (UMP)</b>     | 0.033028 | -0.0137  | 0.10987  | -0.10554 | 0.039466 | -0.00345 | 0.0098   | -0.03421 |
| <b>Valine</b>                          | 0.008038 | -0.06503 | 0.039927 | -0.06795 | 0.08026  | -0.05086 | -0.01153 | 0.063321 |
| <b>Vanillyl mandelic acid</b>          | -0.01957 | -0.01101 | -0.13367 | 0.11795  | -0.04115 | 0.010747 | 0.00402  | -0.01673 |
| <b>Vitexin</b>                         | -0.01169 | 0.061157 | 0.082433 | -0.07628 | 0.009734 | -0.00052 | 0.006033 | 0.005673 |
| <b>Xanthine</b>                        | -0.07982 | 0.033931 | 0.077133 | -0.0776  | 0.011728 | -0.00074 | 0.002658 | -0.00784 |
| <b>Xanthosine</b>                      | -0.08443 | 0.024058 | 0.083862 | -0.07757 | 0.012745 | -0.00904 | 0.011486 | -0.00809 |
| <b>ZINGEROL</b>                        | 0.034778 | 0.059999 | -0.09335 | 0.081798 | -0.0299  | 0.008037 | -0.00076 | 0.002769 |
| <b>α,α-Trehalose</b>                   | 0.12066  | -0.03023 | -0.07826 | 0.0869   | -0.02943 | 0.022113 | -0.0152  | 0.013574 |
