# Supplementary material
Source: Royal Society of Chemistry journal article supplement (doi:10.1039/d6ay00096g)
Supplement: d6ay00096g5.pdf [file d6ay00096g5.pdf]

**Supplementary Table 4:** False Discovery Rate (FDR)-Based Confidence Assessment for Compounds Identified in LC–HRMS Analysis of Black Tea Samples

| Name                                                                                                                              | f.value | p.value  | (-LOG10(p)) | FDR      |
|-----------------------------------------------------------------------------------------------------------------------------------|---------|----------|-------------|----------|
| 9-HpODE                                                                                                                           | 1012.6  | 1.89E-18 | 17.723      | 2.97E-18 |
| Malic acid                                                                                                                        | 1073.6  | 1.19E-18 | 17.925      | 1.92E-18 |
| (1S)-1,5-Anhydro-2-O-(6-deoxy- $\alpha$ -L-mannopyranosyl)-1-[5,7-dihydroxy-2-(4-hydroxyphenyl)-4-oxo-4H-chromen-6-yl]-D-glucitol | 11364   | 7.83E-27 | 26.106      | 9.98E-26 |
| (1 $\xi$ )-1,5-Anhydro-1-[(2R,3R)-3,5,7-trihydroxy-2-(4-hydroxyphenyl)-4-oxo-3,4-dihydro-2H-chromen-6-yl]-D-glucitol              | 4384.7  | 1.58E-23 | 22.8        | 5.30E-23 |
| 1-(5,8-Dimethoxy-2,2-dimethyl-2H-chromen-6-yl)ethanone                                                                            | 33683   | 1.32E-30 | 29.88       | 4.48E-29 |
| 1,3,6-Trigalloyl glucose                                                                                                          | 7754.5  | 1.66E-25 | 24.779      | 8.69E-25 |
| 1,6-Bis-O-(3,4,5-trihydroxybenzoyl)hexopyranose                                                                                   | 9618.5  | 2.97E-26 | 25.527      | 2.33E-25 |
| 1-[(3-Carboxypropyl)amino]-1-deoxy-beta-D-fructofuranose                                                                          | 1763.8  | 2.27E-20 | 19.643      | 4.38E-20 |
| 13(S)-HpOTrE                                                                                                                      | 1264.8  | 3.22E-19 | 18.492      | 5.52E-19 |
| 13-HOTrE                                                                                                                          | 408.23  | 2.54E-15 | 14.595      | 3.32E-15 |
| 1-Oxo-1,2,4-butanetricarboxylic acid                                                                                              | 1020.3  | 1.78E-18 | 17.749      | 2.82E-18 |
| 1-Vinyl-2-pyrrolidone                                                                                                             | 10509   | 1.46E-26 | 25.835      | 1.57E-25 |
| 2-(2-phenylethoxy)-6-[[[(3,4,5-trihydroxyoxan-2-yl)oxy]methyl]oxane-3,4,5-triol                                                   | 2339.6  | 2.39E-21 | 20.622      | 5.02E-21 |
| 2-(acetylamino)-3-(1H-indol-3-yl)propanoic acid                                                                                   | 2316.3  | 2.59E-21 | 20.587      | 5.33E-21 |
| 2,4-Dihydroxybenzoic acid                                                                                                         | 1925.6  | 1.13E-20 | 19.947      | 2.30E-20 |
| 2,5-Furandicarboxylic acid                                                                                                        | 421.86  | 1.96E-15 | 14.708      | 2.60E-15 |
| 2,6-Diamino-4-hexenoic acid                                                                                                       | 48.192  | 3.10E-08 | 7.5091      | 3.40E-08 |
| 2-[1-(2H-1,3-benzodioxol-5-yl)propan-2-yl]-6-methoxy-4-(prop-2-en-1-yl)phenol                                                     | 862.61  | 6.77E-18 | 17.17       | 1.02E-17 |
| 2-Coumaroylquinic acid                                                                                                            | 3280.2  | 1.61E-22 | 21.794      | 4.21E-22 |
| 2'-deoxymugineic acid                                                                                                             | 26.02   | 2.16E-06 | 5.6663      | 2.34E-06 |
| 2-Deoxypentose                                                                                                                    | 460.57  | 9.79E-16 | 15.009      | 1.31E-15 |
| 2-monolinolenin                                                                                                                   | 2525.5  | 1.30E-21 | 20.887      | 2.82E-21 |
| 3-(Sulfoxy)butanoic acid                                                                                                          | 4711    | 8.92E-24 | 23.05       | 3.09E-23 |
| 3,4,5-trihydroxycyclohex-1-ene-1-carboxylic acid                                                                                  | 532.15  | 3.12E-16 | 15.505      | 4.34E-16 |
| 3,4-Dihydroxybenzaldehyde                                                                                                         | 234.33  | 1.99E-13 | 12.702      | 2.40E-13 |
| 3,5-Dihydroxy-4-(sulfoxy)benzoic acid                                                                                             | 1602.6  | 4.88E-20 | 19.311      | 8.90E-20 |
| 3,6-Dideoxy-6-sulfohex-2-ulosonic acid                                                                                            | 869.2   | 6.37E-18 | 17.196      | 9.63E-18 |
| 3-Amino-2-azepanone                                                                                                               | 5358.2  | 3.19E-24 | 23.496      | 1.16E-23 |
| 3-Coumaric acid                                                                                                                   | 1586.9  | 5.28E-20 | 19.277      | 9.54E-20 |
| 3-Hydroxy-4-methoxy-5-(sulfoxy)benzoic acid                                                                                       | 8764.3  | 6.25E-26 | 25.204      | 3.89E-25 |
| 3-Hydroxy-N-(2-oxotetrahydro-3-furanyl)butanamide                                                                                 | 3069.6  | 2.73E-22 | 21.563      | 6.64E-22 |
| 3-Isopropylmalic acid                                                                                                             | 20572   | 6.80E-29 | 28.168      | 1.33E-27 |
| 3-Methylxanthine                                                                                                                  | 1922.1  | 1.15E-20 | 19.941      | 2.31E-20 |
| 3-sulfolactic acid                                                                                                                | 86.377  | 4.25E-10 | 9.3713      | 4.79E-10 |
| 3-sulfopropanediol                                                                                                                | 1060.7  | 1.31E-18 | 17.884      | 2.10E-18 |
| 4,5-Dihydroxy-3-oxo-1-cyclohexene-1-carboxylic acid                                                                               | 3765.1  | 5.35E-23 | 22.272      | 1.56E-22 |
| 4-acetamidobutyrate                                                                                                               | 4698    | 9.12E-24 | 23.04       | 3.10E-23 |
| 4-Coumaric acid                                                                                                                   | 1673.7  | 3.45E-20 | 19.462      | 6.35E-20 |
| 4-Hydroxy-8-(beta-D-talopyranosyloxy)-2-quinolinecarboxylic acid                                                                  | 3509.6  | 9.37E-23 | 22.028      | 2.58E-22 |
| 4-Hydroxybenzaldehyde                                                                                                             | 8344.5  | 9.25E-26 | 25.034      | 5.39E-25 |
| 4-Hydroxybenzoic acid                                                                                                             | 1491.2  | 8.67E-20 | 19.062      | 1.55E-19 |
| 4-Methyleneglutamic acid                                                                                                          | 1114.8  | 8.80E-19 | 18.055      | 1.44E-18 |
| 4-METHYLUMBELLIFERYL- $\alpha$ -D-GLUCOSE                                                                                         | 1211.5  | 4.54E-19 | 18.343      | 7.59E-19 |
| 4-Oxoproline                                                                                                                      | 3889.8  | 4.12E-23 | 22.385      | 1.26E-22 |
| 4-p-Coumaroylquinic acid                                                                                                          | 15.31   | 5.81E-05 | 4.2355      | 6.18E-05 |
| 5-(2-Carboxyethyl)-2-hydroxyphenyl beta-D-glucopyranosiduronic acid                                                               | 9969.2  | 2.23E-26 | 25.652      | 2.09E-25 |
| 5,7-Dihydroxy-2-(4-hydroxyphenyl)-6,8-bis[3,4,5-trihydroxy-6-(hydroxymethyl)tetrahydro-2H-pyran-2-yl]-4H-chromen-4-one            | 567.07  | 1.89E-16 | 15.724      | 2.64E-16 |
| 5-[5-(methoxycarbonyl)-5,8a-dimethyl-2-methylidene-decahydronaphthalen-1-yl]-3-methylpentanoic acid                               | 2681.3  | 8.04E-22 | 21.094      | 1.78E-21 |
| 5-Hydroxy-2-furoic acid                                                                                                           | 837.95  | 8.52E-18 | 17.069      | 1.27E-17 |
| 5-hydroxy-4-methoxy-5,6-dihydro-2H-pyran-2-one                                                                                    | 62.39   | 4.76E-09 | 8.3221      | 5.31E-09 |
| 7-Hydroxycoumarine                                                                                                                | 7832    | 1.53E-25 | 24.814      | 8.24E-25 |
| 8-hydroxy-deoxyguanosine                                                                                                          | 329.48  | 1.37E-14 | 13.862      | 1.74E-14 |
| Acetophenone                                                                                                                      | 2382    | 2.07E-21 | 20.684      | 4.40E-21 |
| Adenine                                                                                                                           | 3.3567  | 0.045209 | 1.3448      | 0.047295 |
| Adenosine                                                                                                                         | 9956.7  | 2.25E-26 | 25.647      | 2.09E-25 |
| Adenosine 3'5'-cyclic monophosphate                                                                                               | 1852.9  | 1.54E-20 | 19.814      | 3.01E-20 |
| Adenosine 5'-monophosphate                                                                                                        | 5211.6  | 3.98E-24 | 23.4        | 1.42E-23 |
| Afzelin                                                                                                                           | 396.87  | 3.17E-15 | 14.499      | 4.12E-15 |
| alpha-D-Xylopyranosyl-(1->6)-beta-D-glucopyranosyl-(1->4)-beta-D-glucopyranose                                                    | 20438   | 7.16E-29 | 28.145      | 1.33E-27 |
| alpha-Ketoglutaric acid                                                                                                           | 212.49  | 4.27E-13 | 12.37       | 5.06E-13 |
| Astragaln                                                                                                                         | 137.76  | 1.22E-11 | 10.913      | 1.43E-11 |
| Astringin                                                                                                                         | 6774.1  | 4.90E-25 | 24.31       | 2.32E-24 |
| Benzoic acid                                                                                                                      | 10158   | 1.92E-26 | 25.717      | 1.96E-25 |
| Betaine                                                                                                                           | 188.44  | 1.09E-12 | 11.964      | 1.28E-12 |
| Caffeine                                                                                                                          | 213.76  | 4.07E-13 | 12.39       | 4.86E-13 |
| Catechin                                                                                                                          | 5565.1  | 2.36E-24 | 23.628      | 8.90E-24 |
| Catechin Gallate                                                                                                                  | 18.762  | 1.72E-05 | 4.7635      | 1.85E-05 |
| Chlorogenic acid                                                                                                                  | 4143.3  | 2.49E-23 | 22.604      | 8.06E-23 |
| Choline                                                                                                                           | 109.5   | 7.08E-11 | 10.15       | 8.16E-11 |
| Citric acid                                                                                                                       | 473.54  | 7.86E-16 | 15.104      | 1.06E-15 |
| L-coprine                                                                                                                         | 89.316  | 3.31E-10 | 9.4805      | 3.75E-10 |

| Name                                                           | f.value | p.value  | (-LOG10(p)) | FDR      |
|----------------------------------------------------------------|---------|----------|-------------|----------|
| Corchorifatty acid F                                           | 485.1   | 6.50E-16 | 15.187      | 8.90E-16 |
| corilagin                                                      | 3226.3  | 1.84E-22 | 21.736      | 4.68E-22 |
| Corymboside                                                    | 8467.3  | 8.23E-26 | 25.085      | 4.94E-25 |
| Coumarin                                                       | 2735.2  | 6.86E-22 | 21.163      | 1.56E-21 |
| Cyanidin                                                       | 95.851  | 1.94E-10 | 9.7118      | 2.23E-10 |
| Cytosine                                                       | 428.13  | 1.74E-15 | 14.758      | 2.33E-15 |
| D-(-)-Quinic acid                                              | 687.43  | 4.11E-17 | 16.387      | 5.98E-17 |
| D-(-)-Glutamine                                                | 1738.3  | 2.55E-20 | 19.593      | 4.78E-20 |
| dihomomethionine                                               | 51977   | 4.10E-32 | 31.387      | 2.79E-30 |
| DL-2,6-Diaminopimelic acid                                     | 891.25  | 5.22E-18 | 17.282      | 7.95E-18 |
| DL-Arginine                                                    | 918.77  | 4.10E-18 | 17.387      | 6.29E-18 |
| D-PANTOTHENIC ACID                                             | 3521.2  | 9.13E-23 | 22.039      | 2.55E-22 |
| D-(+)-Pyroglutamic Acid                                        | 1212.7  | 4.50E-19 | 18.347      | 7.59E-19 |
| D-Sucrose                                                      | 3092.1  | 2.58E-22 | 21.589      | 6.34E-22 |
| Ellagic acid                                                   | 10964   | 1.04E-26 | 25.982      | 1.25E-25 |
| Epicatechin                                                    | 5590.1  | 2.27E-24 | 23.643      | 8.90E-24 |
| EPIGALLOCATECHIN 3-O-(3-O-METHYL)GALLATE                       | 59.367  | 6.85E-09 | 8.1642      | 7.60E-09 |
| Epigallocatechin gallate                                       | 368.53  | 5.69E-15 | 14.245      | 7.30E-15 |
| Esculetin                                                      | 7550.2  | 2.06E-25 | 24.687      | 1.05E-24 |
| Frovatriptan                                                   | 13528   | 1.94E-27 | 26.712      | 2.83E-26 |
| Fructoselysine                                                 | 22062   | 3.89E-29 | 28.41       | 8.83E-28 |
| Fukiic acid                                                    | 236.9   | 1.83E-13 | 12.739      | 2.22E-13 |
| Galactonic acid                                                | 6974.9  | 3.88E-25 | 24.412      | 1.93E-24 |
| Gallic acid                                                    | 8756.5  | 6.29E-26 | 25.201      | 3.89E-25 |
| Gallocatechin                                                  | 3654.7  | 6.78E-23 | 22.169      | 1.95E-22 |
| gamma-Aminobutyric acid                                        | 3245    | 1.75E-22 | 21.756      | 4.53E-22 |
| gamma-glutamyltyramine                                         | 10589   | 1.38E-26 | 25.861      | 1.56E-25 |
| Glucogallin                                                    | 300.61  | 2.82E-14 | 13.549      | 3.51E-14 |
| Glu-Glu                                                        | 2325.2  | 2.51E-21 | 20.601      | 5.22E-21 |
| L-Glutamic acid                                                | 2385.7  | 2.04E-21 | 20.69       | 4.39E-21 |
| Guanine                                                        | 348     | 8.94E-15 | 14.049      | 1.14E-14 |
| Guanosine monophosphate (GMP)                                  | 3545.3  | 8.65E-23 | 22.063      | 2.45E-22 |
| Heptylbenzene                                                  | 3880.6  | 4.20E-23 | 22.377      | 1.26E-22 |
| Hexaric acid                                                   | 2922.2  | 4.05E-22 | 21.393      | 9.71E-22 |
| DL-Histidine                                                   | 3998.3  | 3.31E-23 | 22.48       | 1.05E-22 |
| Isocitric acid                                                 | 1680.7  | 3.34E-20 | 19.476      | 6.20E-20 |
| Isoleucine                                                     | 40377   | 3.09E-31 | 30.51       | 1.26E-29 |
| isopropylmalic acid                                            | 12553   | 3.53E-27 | 26.452      | 4.80E-26 |
| Juglalin                                                       | 410.67  | 2.42E-15 | 14.616      | 3.19E-15 |
| Kaempferol                                                     | 6914.4  | 4.16E-25 | 24.381      | 2.02E-24 |
| Kaempferol-3-O-(6'''-trans-P-coumaroyl-2''-glucosyl)rhamnoside | 1744.2  | 2.49E-20 | 19.604      | 4.70E-20 |
| Kynurenic acid                                                 | 394.42  | 3.33E-15 | 14.477      | 4.30E-15 |
| Lamiide                                                        | 3987.7  | 3.38E-23 | 22.471      | 1.06E-22 |
| Leucine                                                        | 22056   | 3.89E-29 | 28.41       | 8.83E-28 |
| Leucylproline                                                  | 665.35  | 5.32E-17 | 16.274      | 7.64E-17 |
| DL-Glutamine                                                   | 5926.8  | 1.42E-24 | 23.846      | 5.93E-24 |
| L-Pyroglutamic acid                                            | 3394.3  | 1.22E-22 | 21.912      | 3.24E-22 |
| Luteolin                                                       | 126.11  | 2.41E-11 | 10.618      | 2.81E-11 |
| Maleamic acid                                                  | 300.35  | 2.84E-14 | 13.546      | 3.52E-14 |
| Metharbital                                                    | 962.86  | 2.82E-18 | 17.549      | 4.40E-18 |
| Methyl cinnamate                                               | 2834.3  | 5.16E-22 | 21.287      | 1.21E-21 |
| Methyl gallate                                                 | 1292.1  | 2.72E-19 | 18.566      | 4.70E-19 |
| MFCD00135810                                                   | 5513.6  | 2.54E-24 | 23.595      | 9.41E-24 |
| Miglitol                                                       | 319.55  | 1.75E-14 | 13.758      | 2.20E-14 |
| muramic acid                                                   | 832.49  | 8.98E-18 | 17.047      | 1.33E-17 |
| Myricetin                                                      | 77824   | 1.62E-33 | 32.79       | 3.31E-31 |
| myricetin 3-O-beta-D-galactopyranoside                         | 16572   | 3.83E-28 | 27.417      | 6.01E-27 |
| N-(3-Carboxypropanoyl)-5-hydroxynorvaline                      | 34.12   | 3.49E-07 | 6.4569      | 3.81E-07 |
| N-acetyl-L-2-aminoadipic acid                                  | 49.898  | 2.41E-08 | 7.6175      | 2.66E-08 |
| N-Acetylneuraminic acid                                        | 3124.4  | 2.37E-22 | 21.625      | 5.97E-22 |
| N-Acetylmethionine                                             | 484.51  | 6.56E-16 | 15.183      | 8.92E-16 |
| Naringenin                                                     | 18.058  | 2.18E-05 | 4.6622      | 2.33E-05 |
| N-Benzylformamide                                              | 7840.4  | 1.52E-25 | 24.818      | 8.24E-25 |
| Neochlorogenic acid                                            | 292.85  | 3.47E-14 | 13.46       | 4.26E-14 |
| N-Glycosyl-L-asparagine                                        | 1806.4  | 1.88E-20 | 19.726      | 3.65E-20 |
| Niacin                                                         | 305.65  | 2.48E-14 | 13.606      | 3.10E-14 |
| nicotianamine                                                  | 6559.8  | 6.33E-25 | 24.199      | 2.94E-24 |
| Nicotinamide                                                   | 634.85  | 7.72E-17 | 16.113      | 1.10E-16 |
| Nicotinic acid                                                 | 603.71  | 1.15E-16 | 15.939      | 1.63E-16 |
| Nipecotic acid                                                 | 9417.3  | 3.52E-26 | 25.454      | 2.66E-25 |
| Nor Leucine                                                    | 685.38  | 4.20E-17 | 16.376      | 6.08E-17 |
| NP-000358                                                      | 69096   | 4.20E-33 | 32.376      | 4.29E-31 |
| NP-000587                                                      | 1425.3  | 1.24E-19 | 18.905      | 2.21E-19 |
| NP-001346                                                      | 3868.8  | 4.30E-23 | 22.366      | 1.27E-22 |
| NP-003191                                                      | 1748.4  | 2.44E-20 | 19.613      | 4.65E-20 |
| NP-020139                                                      | 6117.7  | 1.11E-24 | 23.956      | 4.70E-24 |
| NP-020760                                                      | 2585.6  | 1.08E-21 | 20.969      | 2.36E-21 |
| N-Succinyl-L-diaminopimelic acid                               | 1910.8  | 1.20E-20 | 19.92       | 2.40E-20 |
| N-Vinyl-2-pyrrolidone                                          | 946.87  | 3.23E-18 | 17.491      | 4.98E-18 |
| Oxypinnatanine                                                 | 1168.7  | 6.04E-19 | 18.219      | 1.00E-18 |
| Patuletin                                                      | 7.6166  | 0.002199 | 2.6578      | 0.002312 |

| Name                               | f.value | p.value  | (-LOG10(p)) | FDR      |
|------------------------------------|---------|----------|-------------|----------|
| L-Phenylalanine                    | 9639.6  | 2.92E-26 | 25.535      | 2.33E-25 |
| Phloionolic acid                   | 5008.2  | 5.47E-24 | 23.262      | 1.92E-23 |
| Pipecolic acid                     | 9691.4  | 2.80E-26 | 25.554      | 2.33E-25 |
| Pirbuterol                         | 253.47  | 1.08E-13 | 12.968      | 1.31E-13 |
| Procyanidin A2                     | 9.7134  | 0.000688 | 3.1623      | 0.000727 |
| Procyanidin B2                     | 2691    | 7.81E-22 | 21.107      | 1.75E-21 |
| Prodelfinidin B1                   | 5710.4  | 1.92E-24 | 23.717      | 7.82E-24 |
| Proline                            | 5693    | 1.97E-24 | 23.707      | 7.86E-24 |
| Quercetin                          | 694.18  | 3.80E-17 | 16.42       | 5.58E-17 |
| QUERCETIN 3,7-DIGLUCOSIDE          | 1142.6  | 7.23E-19 | 18.141      | 1.19E-18 |
| Quercetin 3-O-caffeyl-glucoside    | 21.872  | 6.62E-06 | 5.1793      | 7.14E-06 |
| Quercetin-3-O- $\alpha$ -pentoside | 8850.4  | 5.78E-26 | 25.238      | 3.80E-25 |
| Quercetin-3 $\beta$ -D-glucoside   | 3115.1  | 2.43E-22 | 21.614      | 6.04E-22 |
| Robinin                            | 22055   | 3.90E-29 | 28.409      | 8.83E-28 |
| Rutin                              | 6516.4  | 6.68E-25 | 24.175      | 3.03E-24 |
| saccharopine                       | 1864    | 1.46E-20 | 19.835      | 2.90E-20 |
| D-Serine                           | 1368.8  | 1.72E-19 | 18.766      | 2.99E-19 |
| Spermidine                         | 3480.5  | 1.00E-22 | 21.999      | 2.72E-22 |
| Spermine                           | 2766.9  | 6.26E-22 | 21.203      | 1.43E-21 |
| DL-Stachydrine                     | 41242   | 2.61E-31 | 30.584      | 1.26E-29 |
| Suberic acid                       | 1414.4  | 1.32E-19 | 18.879      | 2.33E-19 |
| Succinic acid                      | 1044.7  | 1.48E-18 | 17.831      | 2.35E-18 |
| Syringetin                         | 9293.8  | 3.91E-26 | 25.408      | 2.85E-25 |
| Theobromine                        | 2801.6  | 5.67E-22 | 21.247      | 1.31E-21 |
| Theogallin                         | 4243.5  | 2.06E-23 | 22.687      | 6.77E-23 |
| Threonine                          | 2908.5  | 4.20E-22 | 21.377      | 9.97E-22 |
| Tiliroside                         | 86.251  | 4.30E-10 | 9.3666      | 4.82E-10 |
| trans-3-Indoleacrylic acid         | 17009   | 3.11E-28 | 27.507      | 5.29E-27 |
| Traumatic Acid                     | 8028.2  | 1.26E-25 | 24.9        | 7.14E-25 |
| Trifolin                           | 9841.3  | 2.47E-26 | 25.607      | 2.19E-25 |
| Tryptophan                         | 1241.4  | 3.74E-19 | 18.427      | 6.35E-19 |
| Tyrosine                           | 8980.3  | 5.14E-26 | 25.289      | 3.62E-25 |
| tyr-thr                            | 123.72  | 2.79E-11 | 10.555      | 3.23E-11 |
| Uracil                             | 518.74  | 3.82E-16 | 15.418      | 5.27E-16 |
| Uridine 5'-diphosphogalactose      | 6261.3  | 9.19E-25 | 24.037      | 4.07E-24 |
| Uridine monophosphate (UMP)        | 214.04  | 4.03E-13 | 12.395      | 4.84E-13 |
| Valine                             | 91.591  | 2.74E-10 | 9.5628      | 3.12E-10 |
| Vanillyl mandelic acid             | 582.85  | 1.52E-16 | 15.818      | 2.14E-16 |
| Vitexin                            | 3394.6  | 1.22E-22 | 21.913      | 3.24E-22 |
| Xanthine                           | 5570.2  | 2.34E-24 | 23.631      | 8.90E-24 |
| Xanthosine                         | 6177.3  | 1.02E-24 | 23.99       | 4.44E-24 |
| ZINGEROL                           | 8912.8  | 5.46E-26 | 25.263      | 3.71E-25 |
| $\alpha,\alpha$ -Trehalose         | 3952.9  | 3.62E-23 | 22.441      | 1.12E-22 |
